# Supplementary material for: Polysaccharide Multilayer Films in Sensors for Detecting Prostate Tumor Cells Based on Hyaluronan-CD44 Interactions
Source: PubMed Central journal article supplement (PMC7349506; doi:10.3390/cells9061563), 2020-06-26
Supplement: cells-09-01563-s001.pdf [file cells-09-01563-s001.pdf]

# Polysaccharide multilayer films in sensors for detecting prostate tumor cells based on hyaluronan-CD44 interactions

J. B. M. Rocha Neto, A. C. Soares, R. A. Bataglioli, O. Carr, C. A. R. Costa,

O. N. Oliveira Jr<sup>3</sup>, M. M. Beppu<sup>1</sup>, H. E. Carvalho\*

\*e-mail: [hern@unicamp.br](mailto:hern@unicamp.br)

## Supporting information

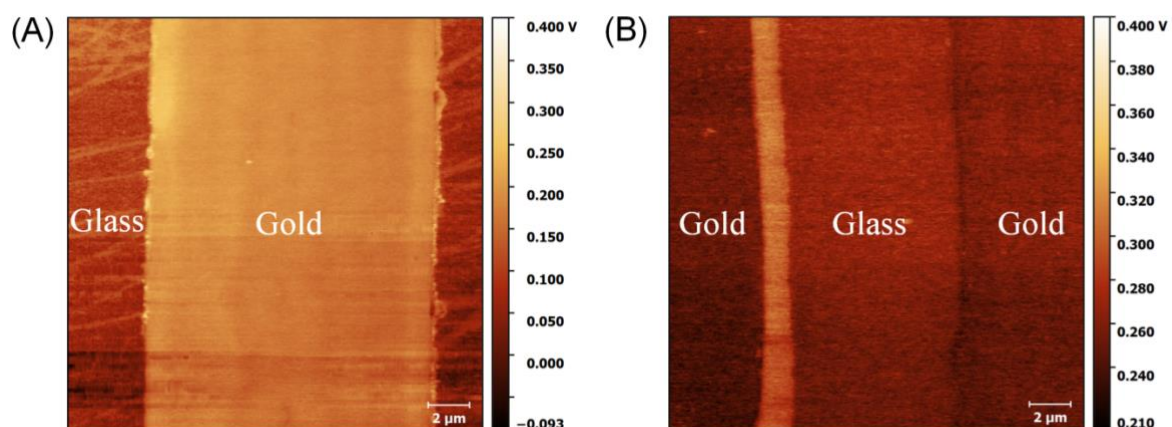

**Figure S1.** KPFM images for interdigitated electrodes (A) before and (B) after deposition of 3.5 bilayers of CHI/HA bilayers. The surface potentials for gold and gold coated with the LbL film are  $(62 \pm 32)$  mV and  $(10 \pm 2)$  mV, respectively. The roughness values were  $(31 \pm 11)$  nm and  $(9 \pm 4)$  nm for glass and glass coated with the LbL film, respectively.

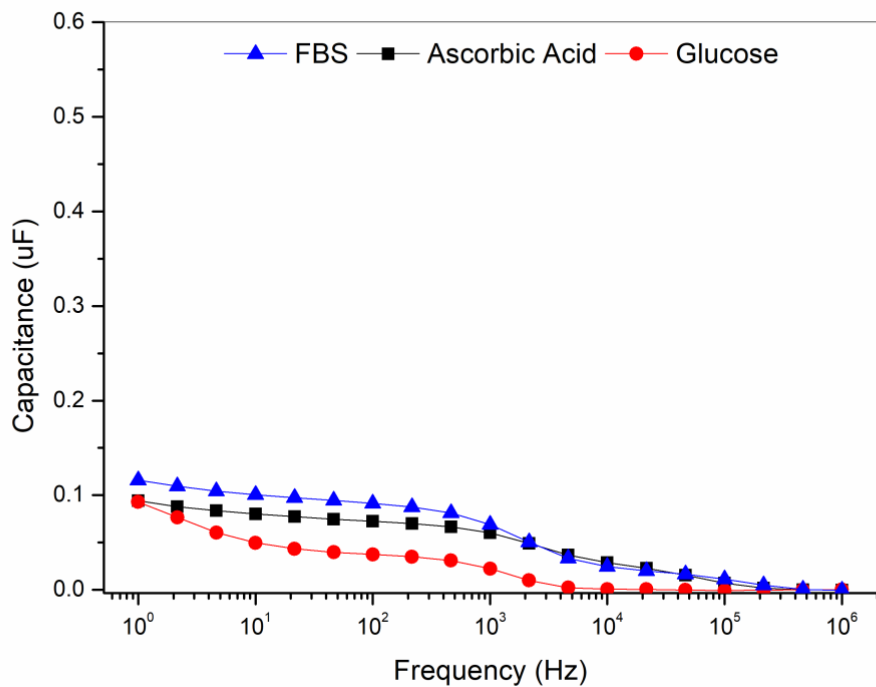

**Figure S2.** Capacitance spectra for electrodes functionalized with 3.5 CHI/HA bilayers exposed to non-specific analytes (glucose (100 mg/dL), ascorbic acid (4.8 mg/mL) and fetal bovine serum (FBS)).

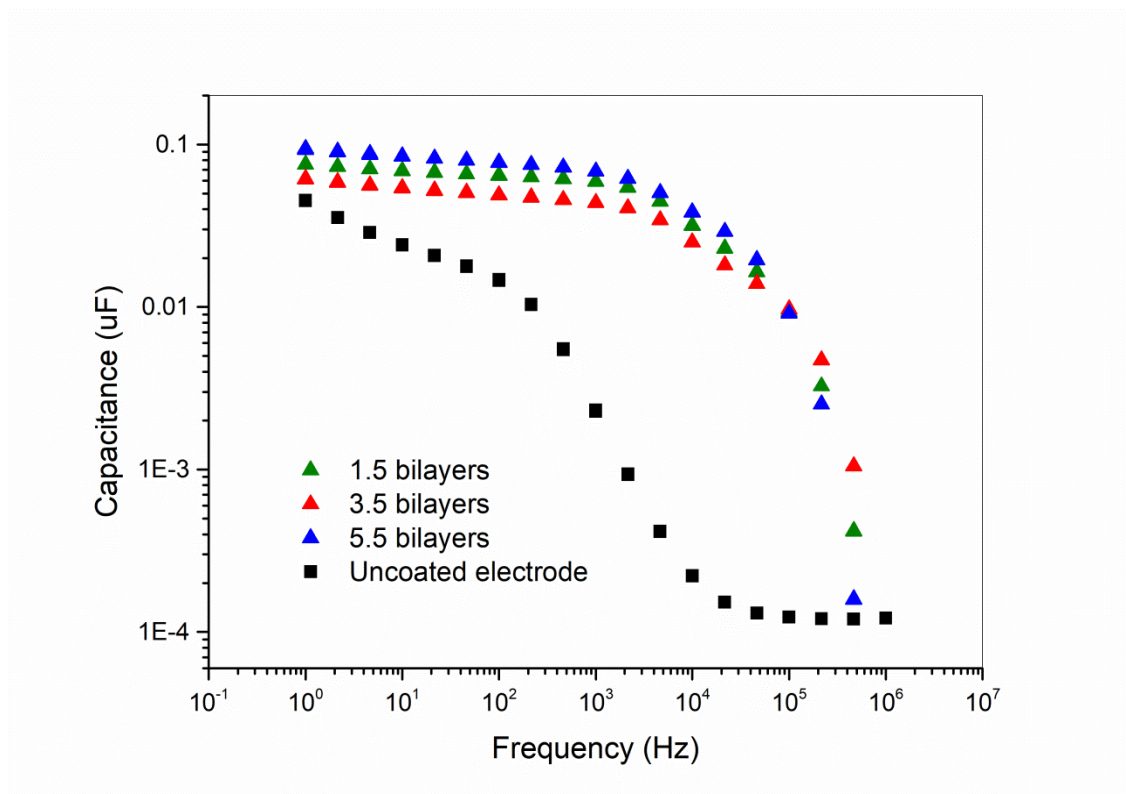

**Figure S3.** Capacitance spectra for an uncoated interdigitated electrode and electrodes functionalized with 1.5, 3.5 and 5.5 CHI/HA bilayers.

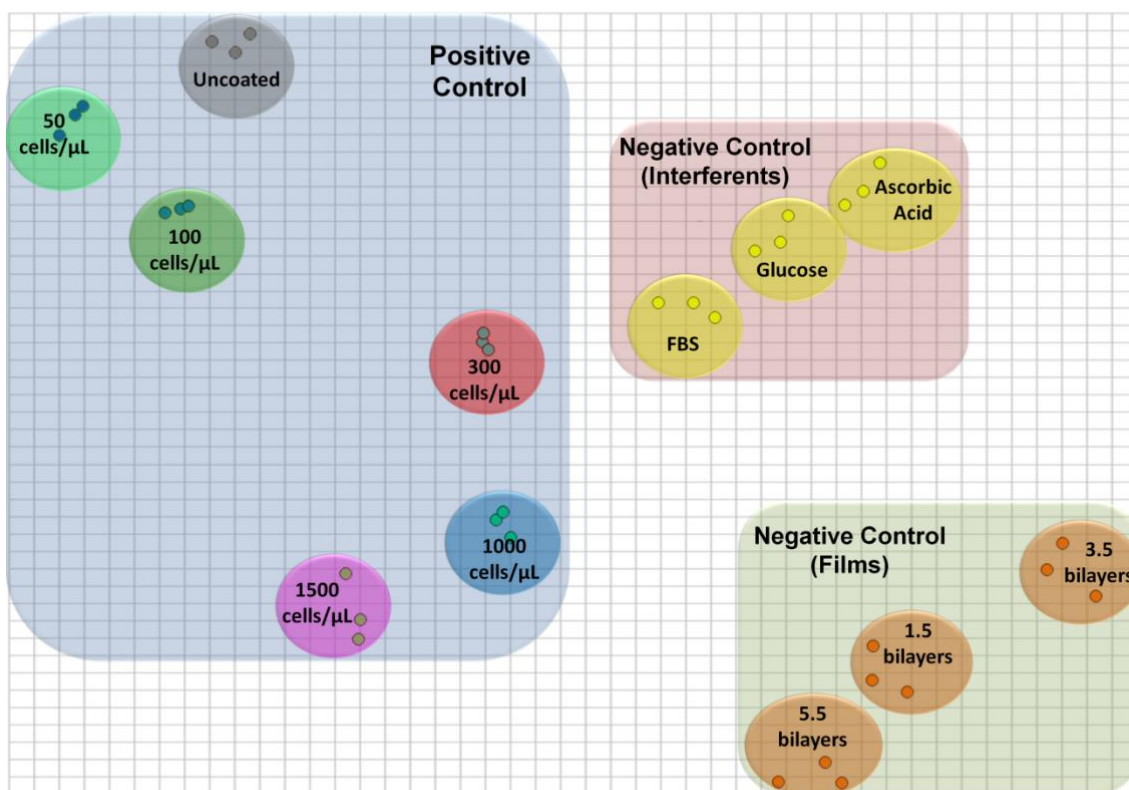

**Figure S4.** 2D DMAP plot for the capacitance spectra for uncoated electrodes and 3.5 CHI/HA multilayers functionalized electrodes exposed to different tumor cell concentrations (50-1500 cells/ $\mu\text{L}$ ) and non-specific analytes (glucose (100 mg/dL), ascorbic acid (4.8 mg/mL) and fetal bovine serum (FBS)). Here, a second control experiment was performed in PBS solution with electrodes covered with different number of HA/CHI bilayers (1.5, 3.5 and 5.5).
